# Supplementary material for: Factors Contributing to Delayed Return to Work among French Healthcare Professionals Afflicted by COVID-19 at a Hospital in the Rhône-Alpes Region, 2021
Source: MDPI journal article supplement (doi:10.3390/ijerph20216979), 2023-10-26
Supplement: s1 [file s1]

**Table S1 : Joinpoint regression analysis results**

| Symptom               | Joinpoint day | Slope before joinpoint | Slope after joinpoint |
|-----------------------|---------------|------------------------|-----------------------|
| Asthenia              | 16            | -0,042                 | -0,007                |
| Fever                 | 6             | -0,091                 | -0,002                |
| Headache              | 11            | -0,061                 | -0,004                |
| Myarthralgia          | 10            | -0,059                 | -0,005                |
| Respiratory disorders | 22            | -0,018                 | 0                     |
| Digestive disorders   | 10            | -0,022                 | 0                     |
| Anosmia               | 22            | -0,020                 | <-0,001               |
| Anxiety               | 17            | -0,021                 | 0                     |

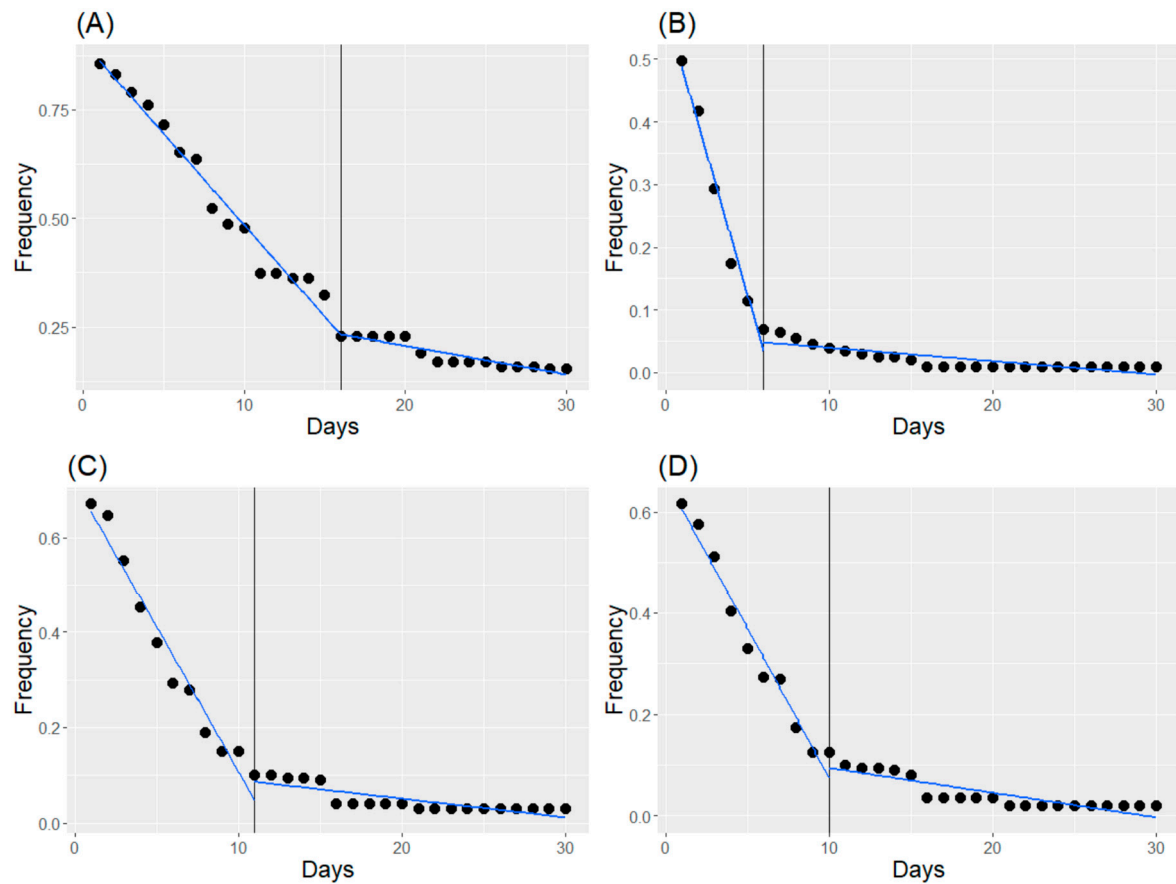

**Figure S1 : Symptoms evolution over time**

- (A) Asthenia frequency over time
- (B) Fever frequency over time
- (C) Headache frequency over time
- (D) Myarthralgia frequency over time

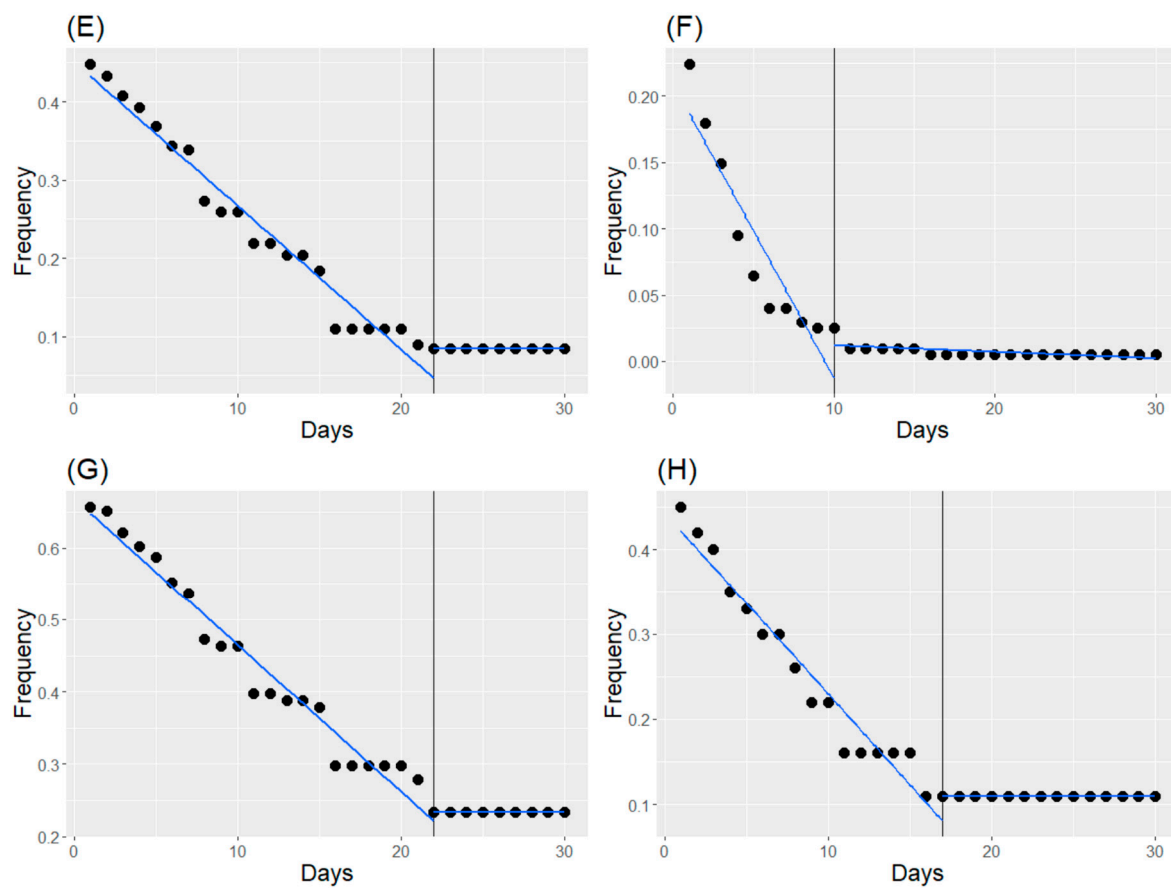

**Figure S1bis :** Symptoms evolution over time  
 (E) Respiratory disorders frequency over time  
 (F) Digestive disorders frequency over time  
 (G) Anosmia frequency over time  
 (H) Anxiety frequency over time
